# Supplementary material
Source: PubMed Central journal article supplement (PMC7745532)
Supplement: es0c06595_si_001.pdf [file es0c06595_si_001.pdf]

# Development of Europe-Wide Models for Particle Elemental Composition Using Supervised Linear Regression and Random Forest

## Supporting Information

Jie Chen<sup>a\*</sup>, Kees de Hoogh<sup>b,c</sup>, John Gulliver<sup>d</sup>, Barbara Hoffmann<sup>e</sup>, Ole Hertel<sup>f</sup>, Matthias Ketzel<sup>f,g</sup>, Gudrun Weinmayr<sup>h</sup>, Mariska Bauwelinck<sup>i</sup>, Aaron van Donkelaar<sup>j,k</sup>, Ulla A. Hvidtfeldt<sup>l</sup>, Richard Atkinson<sup>m</sup>, Nicole AH Janssen<sup>n</sup>, Randall V. Martin<sup>k,j,o</sup>, Evangelia Samoli<sup>p</sup>, Zorana J. Andersen<sup>q</sup>, Bente M. Oftedal<sup>r</sup>, Massimo Stafoggia<sup>s,t</sup>, Tom Bellander<sup>t</sup>, Maciej Strak<sup>a,n</sup>, Kathrin Wolf<sup>u</sup>, Danielle Vienneau<sup>b,c</sup>, Bert Brunekreef<sup>a,v</sup>, Gerard Hoek<sup>a</sup>

- a. Institute for Risk Assessment Sciences (IRAS), Utrecht University, Postbus 80125, 3508 TC, Utrecht, the Netherlands
- b. Swiss Tropical and Public Health Institute, Socinstrasse 57, 4051 Basel, Switzerland
- c. University of Basel, Petersplatz 1, Postfach 4001, Basel, Switzerland
- d. Centre for Environmental Health and Sustainability, School of Geography, Geology and the Environment, University of Leicester, University Road, Leicester, LE1 7RH, UK
- e. Institute for Occupational, Social and Environmental Medicine, Centre for Health and Society, Medical Faculty, Heinrich Heine University Düsseldorf, Universitätsstraße 1, 40225 Düsseldorf, Germany
- f. Department of Environmental Science, Aarhus University, P.O. Box 358, Frederiksborgvej 399, 4000 Roskilde, Denmark
- g. Global Centre for Clean Air Research (GCARE), Department of Civil and Environmental Engineering, University of Surrey, Guildford, GU2 7XH, UK
- h. Institute of Epidemiology and Medical Biometry, Ulm University, Helmholtzstr.22, 89081, Ulm, Germany
- i. Interface Demography – Department of Sociology, Vrije Universiteit Brussel, Pleinlaan 2, 1050, Brussels, Belgium.
- j. Department of Physics and Atmospheric Science, Dalhousie University, B3H 4R2, Halifax, Nova Scotia, Canada
- k. Department of Energy, Environmental & Chemical Engineering, Washington University in St. Louis, St. Louis, Missouri, United States
- l. Danish Cancer Society Research Center, Strandboulevarden 49, 2100 Copenhagen, Denmark
- m. St George's University of London, UK
- n. National Institute for Public Health and the Environment (RIVM), PO Box 1, 3720 BA Bilthoven, the Netherlands
- o. Atomic and Molecular Physics Division, Harvard-Smithsonian Center for Astrophysics, Cambridge, 60 Garden St, Cambridge, MA 02138, US
- p. Department of Hygiene, Epidemiology and Medical Statistics, Medical School, National and Kapodistrian University of Athens, 75 Mikras Asias Str, 115 27 Athens, Greece
- q. University of Copenhagen, Denmark
- r. Department of Environmental Health, Norwegian Institute of Public Health, PO Box 4404 Nydalen N-0403 Oslo, Norway
- s. Department of Epidemiology, Lazio Region Health Service / ASL Roma 1, Via Cristoforo Colombo, 112 – 00147, Rome, Italy
- t. Institute of Environmental Medicine, Karolinska Institutet, SE-171 77, Stockholm, Sweden
- u. Helmholtz Zentrum München, German Research Center for Environmental Health (GmbH), Institute of Epidemiology, Ingolstädter Landstr. 1, D-85764 Neuherberg, Germany
- v. Julius Center for Health Sciences and Primary Care, University Medical Center Utrecht, Heidelberglaan 100, 3584 CX Utrecht, Netherlands

\*Corresponding author: [j.chen1@uu.nl](mailto:j.chen1@uu.nl)

Number of pages: 16

Number of tables: 4

Number of figures: 6

Table S1. Overview of potential predictor variables

| Group                 | Predictor variable                                                                | Variable Name         | Unit              | Buffer size (radius in m) or point estimate | Direction of effect | Restricted to components |
|-----------------------|-----------------------------------------------------------------------------------|-----------------------|-------------------|---------------------------------------------|---------------------|--------------------------|
| Altitude <sup>a</sup> | Altitude                                                                          | ALT                   |                   | Point (~90m spacing)                        | -                   | All                      |
| Road                  | Road length of major roads in a buffer                                            | MJRD                  | meter             | 50, 100, 200, 300, 400,                     | +                   | All                      |
|                       | Road length of all roads in a buffer                                              | ALRD                  |                   | 500, 700, 1000, 2000, 5000, 10000           |                     |                          |
| CTM estimate          | Black carbon Aerosol Optical Depth                                                | BCAOD                 |                   | Point (~13.9km spacing)                     | +                   | Cu, Fe, K, Ni, V, Zn     |
|                       | Sulphate Aerosol Optical Depth                                                    | SUAOD                 |                   |                                             |                     | Ni, S, V                 |
|                       | Total column SO <sub>2</sub>                                                      | TCSO <sub>2</sub>     |                   |                                             |                     | Ni, S, V                 |
| SAT estimate          | Sulfate                                                                           | SO <sub>4</sub>       | µg/m <sup>3</sup> | Point (~1.11km spacing)                     | +                   | Ni, S, V                 |
|                       | Organic Matter                                                                    | OM                    |                   |                                             |                     | Cu, Fe, K, Ni, V, Zn     |
|                       | Mineral Dust                                                                      | SOIL                  |                   |                                             |                     | All                      |
|                       | Black Carbon                                                                      | BC                    |                   |                                             |                     | Cu, Fe, K, Ni, V, Zn     |
| Population            | Population density                                                                | POP                   |                   | Point (1km spacing)                         | +                   | All                      |
| Land use              | Percent area of continuous urban fabric - high/ low density                       | RES                   | %                 | 50, 100, 200, 300, 400, 500, 600, 700, 800, | +                   | All                      |
|                       | Percent area of total build up                                                    | TBU                   |                   | 1000, 1200, 1500,                           | +                   |                          |
|                       | Percent area of natural lands                                                     | NAT                   |                   | 1800, 2000, 2500,                           | -                   |                          |
|                       | Percent area of industrial/ commercial lands                                      | IND                   |                   | 3000, 3500, 4000,                           | +                   |                          |
|                       | Percent area of ports                                                             | POR                   |                   | 5000, 6000, 7000,                           | +                   |                          |
|                       | Percent area of urban green                                                       | UGR                   |                   | 8000, 10000                                 | -                   |                          |
| Industry              | Inverse distance weighted sum emission amount of Cu within a buffer               | Cu_emi                | ton               | 2000, 4000, 10000                           | +                   | Cu                       |
|                       | Inverse distance weighted sum emission amount of Ni within a buffer               | Ni_emi                |                   |                                             |                     | Ni, V                    |
|                       | Inverse distance weighted sum emission amount of PM <sub>10</sub> within a buffer | PM <sub>10</sub> _emi |                   |                                             |                     | All                      |
|                       | Inverse distance weighted sum emission amount of SO <sub>x</sub> within a buffer  | SO <sub>x</sub> _emi  |                   |                                             |                     | Ni, S, V                 |
|                       |                                                                                   |                       |                   |                                             |                     |                          |

|                                                                                                |                                            |                    |                   |     |     |
|------------------------------------------------------------------------------------------------|--------------------------------------------|--------------------|-------------------|-----|-----|
| Inverse distance weighted sum emission amount of Zn within a buffer                            | Zn_emi                                     |                    |                   |     | Zn  |
| Inverse distance weighted number of industrial sites within a buffer                           | industry                                   |                    |                   |     |     |
| Inverse distance weighted number of industrial sites emitting metal aerosols within a buffer   | metal                                      |                    |                   |     |     |
| Inverse distance weighted number of industrial sites emitting Cu within a buffer               | Cu                                         |                    |                   |     |     |
| Inverse distance weighted number of industrial sites emitting Ni within a buffer               | Ni                                         | count              | 2000, 4000, 10000 | +   | All |
| Inverse distance weighted number of industrial sites emitting PM <sub>10</sub> within a buffer | PM <sub>10</sub>                           |                    |                   |     |     |
| Inverse distance weighted number of industrial sites emitting SO <sub>x</sub> within a buffer  | SO <sub>x</sub>                            |                    |                   |     |     |
| Inverse distance weighted number of industrial sites emitting Zn within a buffer               | Zn                                         |                    |                   |     |     |
| North-south/ east-west gradient <sup>b</sup>                                                   | east-west gradient<br>north-south gradient | X_coord<br>Y_coord | Point             | +/- | All |

CTM = chemical transport model, SAT = satellite-model

<sup>a</sup> Transformed altitude is calculated as  $\sqrt{(\text{nalt}/\text{max}(\text{nalt}))}$ , where  $\text{nalt} = \text{altitude} - \text{min}(\text{altitude})$ .

<sup>b</sup> Transformed X, Y coordinates are calculated as  $X\_coord = (X - X_{min}) / (X_{max} - X_{min})$ ,  $Y\_coord = (Y - Y_{min}) / (Y_{max} - Y_{min})$

Table S2. Performance of PM<sub>2.5</sub> composition models over Europe

| Inclusion of X, Y coordinates        |                 | Component              | Cu   | Fe   | K    | Ni   | S    | Si   | V    | Zn   |
|--------------------------------------|-----------------|------------------------|------|------|------|------|------|------|------|------|
|                                      |                 | No. of sites           | 414  | 413  | 414  | 402  | 404  | 400  | 402  | 413  |
| <b>Five-fold Hold-Out Validation</b> |                 |                        |      |      |      |      |      |      |      |      |
| SLR                                  | One-step        | Regression-based $r^2$ | 0.47 | 0.48 | 0.58 | 0.57 | 0.76 | 0.50 | 0.63 | 0.41 |
|                                      |                 | MSE-based $R^2$        | 0.47 | 0.48 | 0.58 | 0.57 | 0.76 | 0.50 | 0.63 | 0.41 |
|                                      | Two-step, step1 | Regression-based $r^2$ | 0.44 | 0.46 | 0.50 | 0.51 | 0.76 | 0.46 | 0.60 | 0.42 |
|                                      |                 | MSE-based $R^2$        | 0.44 | 0.46 | 0.50 | 0.51 | 0.76 | 0.45 | 0.59 | 0.42 |
|                                      | Two-step, step2 | Regression-based $r^2$ | 0.48 | 0.48 | 0.59 | 0.56 | 0.79 | 0.46 | 0.63 | 0.41 |
|                                      |                 | MSE-based $R^2$        | 0.48 | 0.48 | 0.59 | 0.56 | 0.79 | 0.46 | 0.63 | 0.41 |
| RF                                   | One-step        | Regression-based $r^2$ | 0.60 | 0.60 | 0.82 | 0.74 | 0.91 | 0.62 | 0.85 | 0.68 |
|                                      |                 | MSE-based $R^2$        | 0.59 | 0.60 | 0.82 | 0.74 | 0.91 | 0.62 | 0.85 | 0.67 |
|                                      | Two-step, step1 | Regression-based $r^2$ | 0.59 | 0.59 | 0.79 | 0.74 | 0.90 | 0.60 | 0.84 | 0.68 |
|                                      |                 | MSE-based $R^2$        | 0.58 | 0.59 | 0.78 | 0.74 | 0.90 | 0.60 | 0.86 | 0.68 |
|                                      | Two-step, step2 | Regression-based $r^2$ | 0.59 | 0.61 | 0.80 | 0.76 | 0.90 | 0.62 | 0.86 | 0.71 |
|                                      |                 | MSE-based $R^2$        | 0.59 | 0.61 | 0.80 | 0.76 | 0.90 | 0.62 | 0.86 | 0.71 |

SLR = Supervised Linear Regression; RF = Random Forest;  $r^2$  = squared Pearson correlation; MSE-based  $R^2$  = Mean Square Error-based  $R^2$

Table S3. Truncation frequency (%) for model predictions at 41,936 random locations

| Inclusion of X, Y coordinates |                 |                | Cu   | Fe   | K    | Ni   | S | Si  | V    | Zn   |
|-------------------------------|-----------------|----------------|------|------|------|------|---|-----|------|------|
| SLR                           | one-step        | exceed maximum | 0    | 0    | 0    | 0    | 0 | 0   | 0    | 0.1  |
|                               |                 | negative       | 38.9 | 36.3 | 12   | 26.2 | 0 | 3.9 | 23.7 | 18.1 |
|                               | Two-step, step1 | exceed maximum | 0    | 0    | 0    | 0    | 0 | 0   | 0    | 0.1  |
|                               |                 | negative       | 53.6 | 10   | 0    | 26.7 | 0 | 0   | 24.3 | 19.4 |
|                               | Two-step, step2 | exceed maximum | 0    | 0    | 0    | 0    | 0 | 0   | 0    | 0.1  |
|                               |                 | negative       | 41.3 | 10   | 11.5 | 21.8 | 0 | 0   | 20.5 | 19.8 |
| RF                            | one-step        | exceed maximum | 0    | 0    | 0    | 0    | 0 | 0   | 0    | 0    |
|                               |                 | negative       | 0    | 0    | 0    | 0    | 0 | 0   | 0    | 0    |
|                               | Two-step, step1 | exceed maximum | 0    | 0    | 0    | 0    | 0 | 0   | 0    | 0    |
|                               |                 | negative       | 0    | 0    | 0    | 0    | 0 | 0   | 0    | 0    |
|                               | Two-step, step2 | exceed maximum | 0    | 0    | 0    | 0    | 0 | 0   | 0    | 0    |
|                               |                 | negative       | 0    | 0    | 0    | 0    | 0 | 0   | 0    | 0    |

SLR = Supervised Linear Regression; RF = Random Forest

Table S4. Correlation of predictions at monitoring sites between Europe-wide models<sup>a</sup> and ESCAPE models

|    | Overall $r^2$ | Average of within-area $r^2$ | Range of within-area $r^2$ |
|----|---------------|------------------------------|----------------------------|
| Cu | 0.63          | 0.50                         | (0.02, 0.77)               |
| Fe | 0.55          | 0.47                         | (0.07, 0.75)               |
| K  | 0.26          | 0.10                         | (0.00, 0.47)               |
| Ni | 0.69          | 0.22                         | (0.00, 0.78)               |
| S  | 0.84          | 0.22                         | (0.00, 0.73)               |
| Si | 0.49          | 0.27                         | (0.00, 0.68)               |
| V  | 0.73          | 0.27                         | (0.00, 0.79)               |
| Zn | 0.13          | 0.22                         | (0.00, 0.74)               |

SLR = two-step Supervised Linear Regression step2; ESCAPE = area-specific ESCAPE model predictions;  $r^2$  = squared Pearson correlation

<sup>a</sup> We only presented correlations between ESCAPE and SLR predictions, as correlations between ESCAPE and RF predictions cannot be interpreted because RF models have “by design” perfect predictions at training sites.

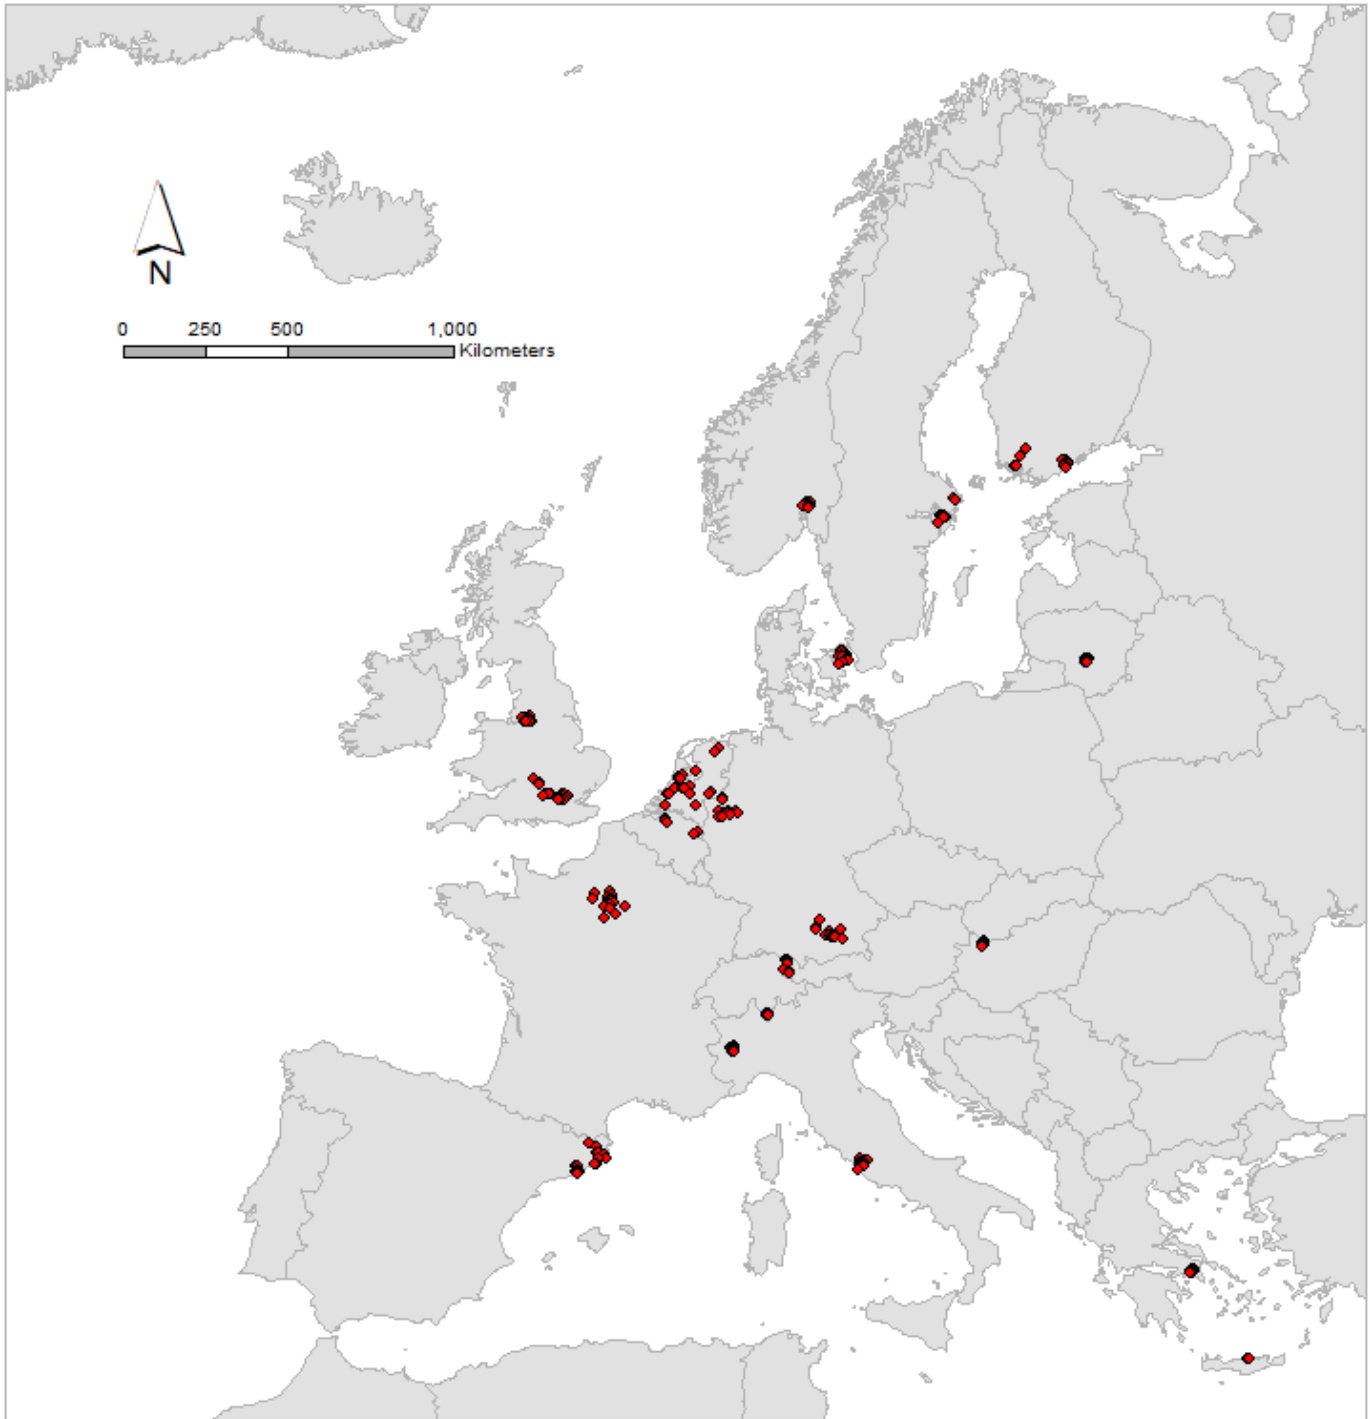

Figure S1. Distribution of 416 ESCAPE monitoring sites across 19 study areas. Each area has 20 sites (40 sites in the Netherlands/Belgium and Catalunya)

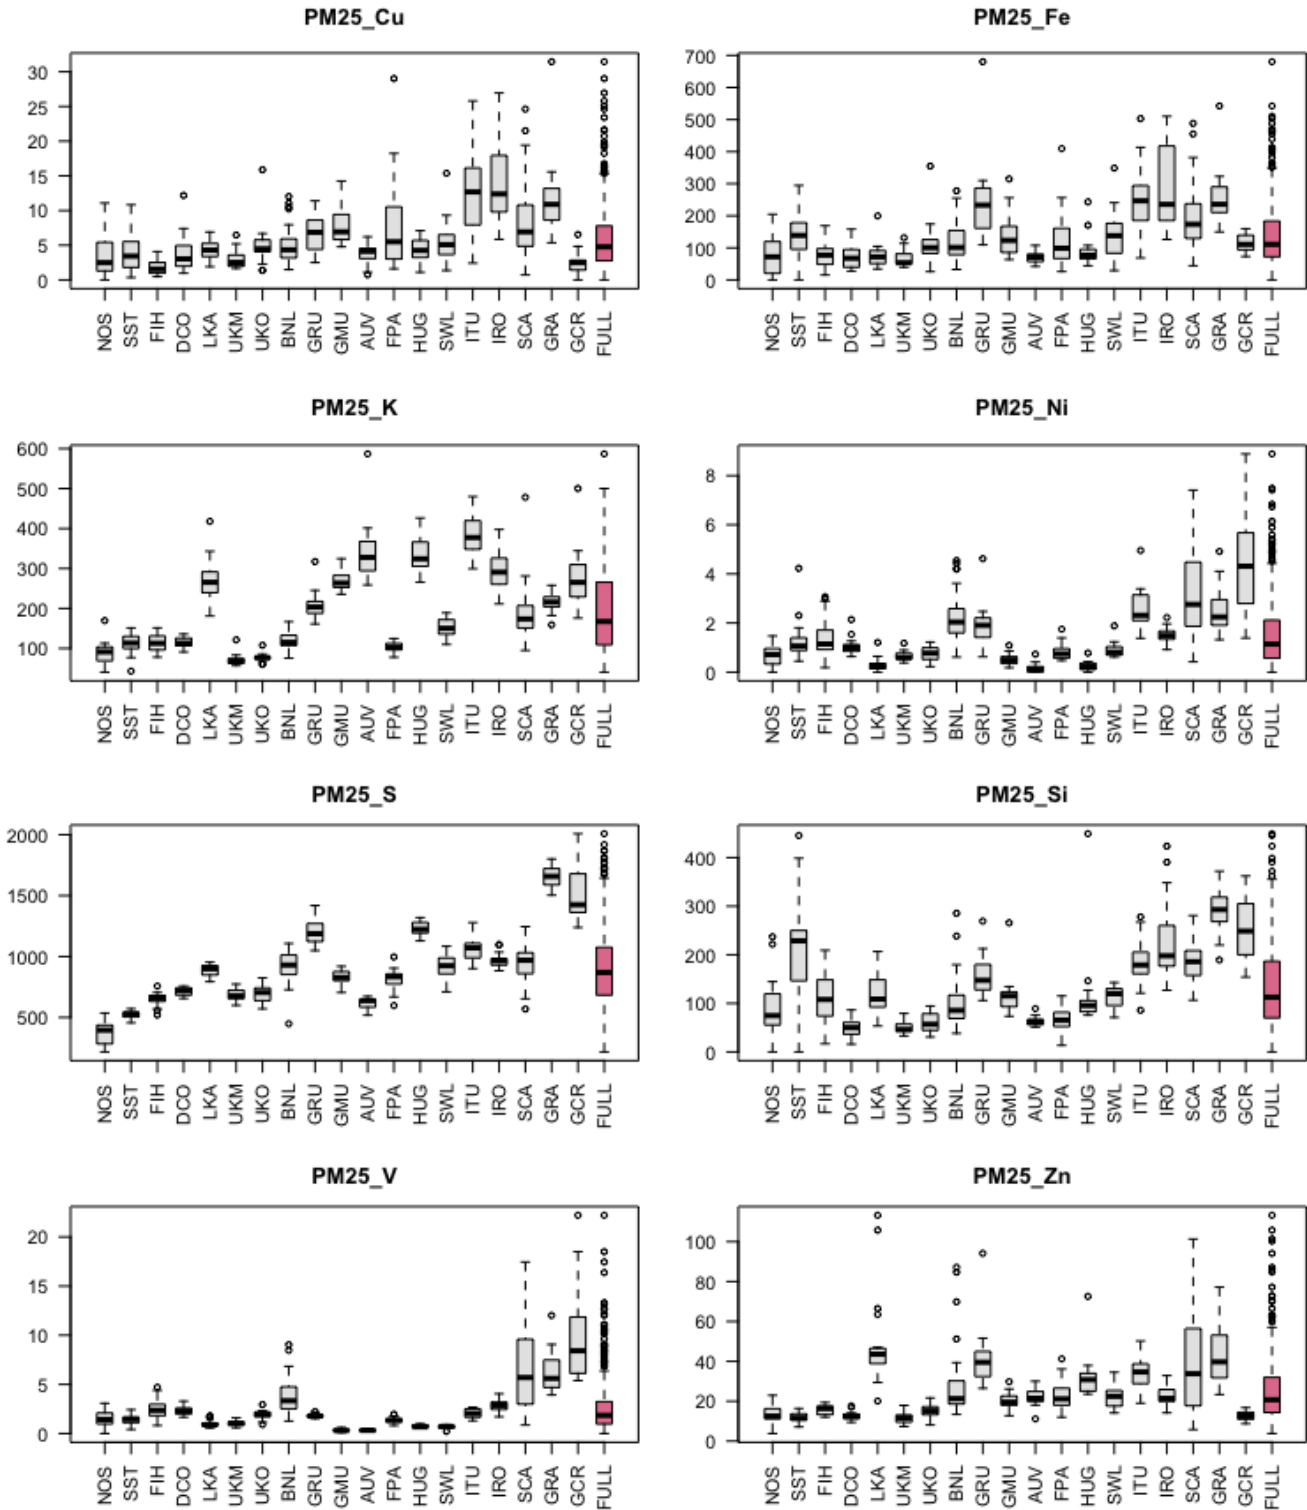

Figure S2. Boxplots of annual mean concentrations for PM<sub>2.5</sub> composition (ng/m<sup>3</sup>) in individual study areas and in the full dataset (box shown in red). Individual study areas are shown from north to south. NOS: Oslo (Norway); SST: Stockholm County (Sweden); FIH: Helsinki/Turku (Finland); DCO: Copenhagen (Denmark); LKA: Kaunas (Lithuania); UKM: Manchester (United Kingdom); UKO: London/Oxford (United Kingdom); BNL: Netherlands/Belgium; GRU: Ruhr Area (Germany); GMU: Munich/Augsburg (Germany); AUV: Vorarlberg (Austria); FPA: Paris (France); HUG: Gyor (Hungary); SWL: Lugano (Switzerland); ITU: Turin (Italy); IRO: Rome (Italy); SCA: Catalunya (Spain); GRA: Athens (Greece); GCR: Heraklion (Greece).

Figure S3. Scatter plots of the stacked predictions at 5 held-out sites versus measurements, obtained from 5-fold hold-out validation analyses

SLR = Supervised Linear Regression; RF = Random Forest

AUV: Vorarlberg (Austria); BNL: Netherlands/Belgium; DCO: Copenhagen (Denmark); FIH: Helsinki/Turku (Finland); FPA: Paris (France); GCR: Heraklion (Greece); GMU: Munich/Augsburg (Germany); GRA: Athens (Greece); GRU: Ruhr Area (Germany); HUG: Gyor (Hungary); IRO: Rome (Italy); ITU: Turin (Italy); LKA: Kaunas (Lithuania); NOS: Oslo (Norway); SCA: Catalunya (Spain); SST: Stockholm County (Sweden); SWL: Lugano (Switzerland); UKM: Manchester (United Kingdom); UKO: London/Oxford (United Kingdom)

(1) PM<sub>2.5</sub> Cu (Left two-step SLR step2, Right two-step RF step 1)

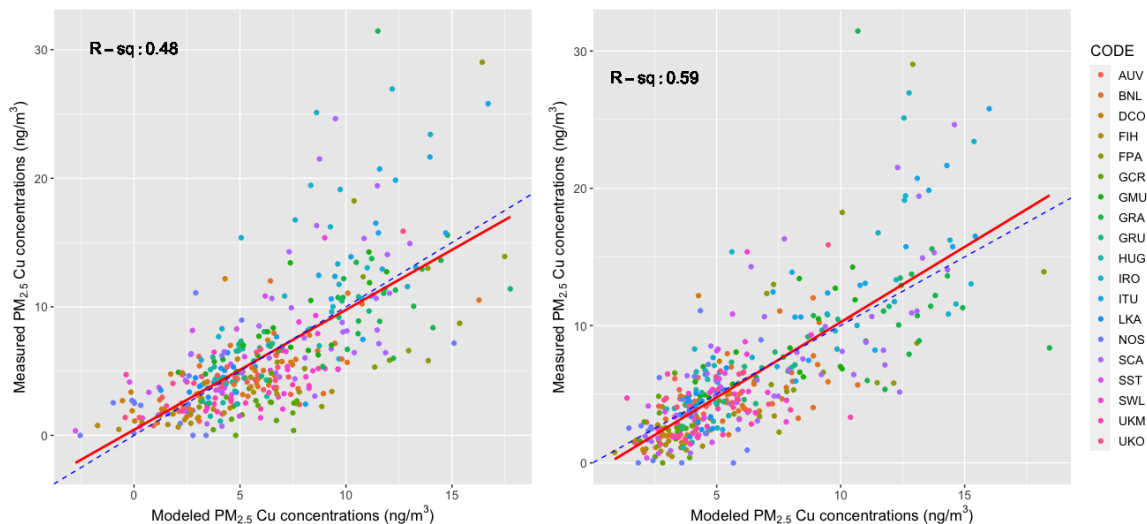

(2) PM<sub>2.5</sub> Fe (Left two-step SLR step2, Right two-step RF step 1)

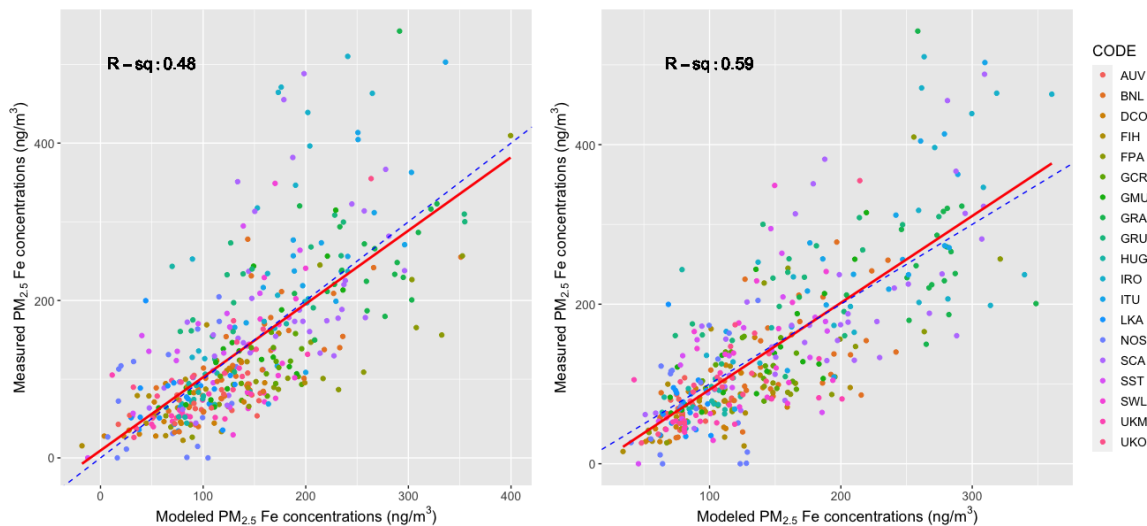



(3) PM<sub>2.5</sub> K (Left two-step SLR step2, Right two-step RF step 1)

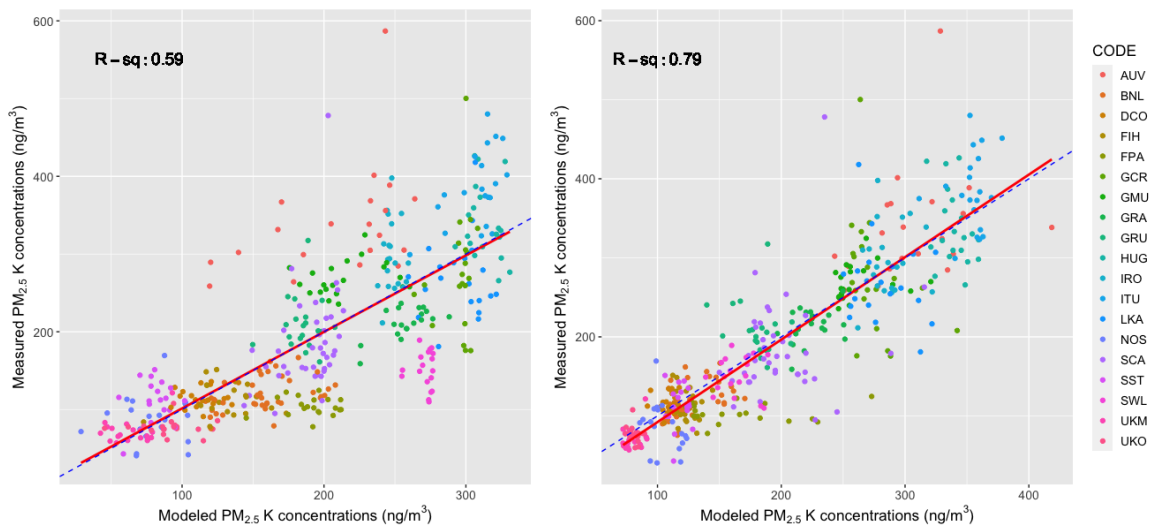

(4) PM<sub>2.5</sub> Ni (Left two-step SLR step2, Right two-step RF step 1)

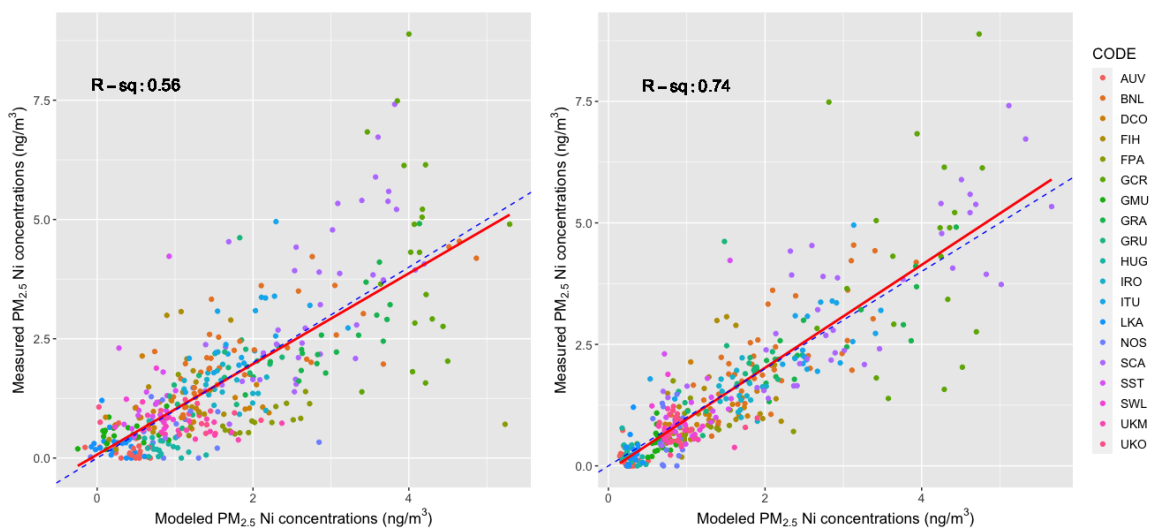

(5) PM<sub>2.5</sub> S (Left two-step SLR step2, Right two-step RF step 1)

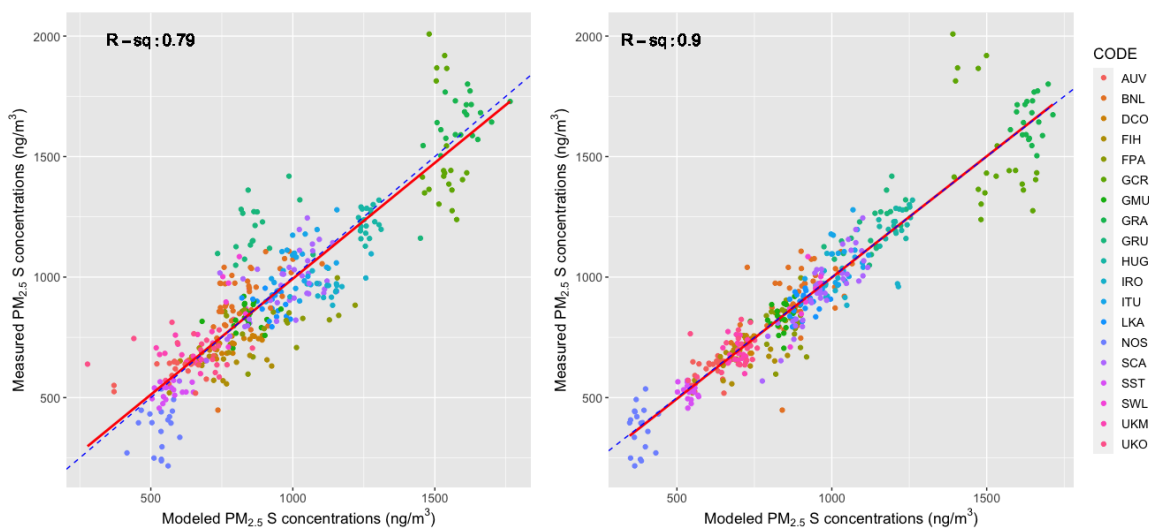

(6) PM<sub>2.5</sub> Si (Left two-step SLR step2, Right two-step RF step 1)

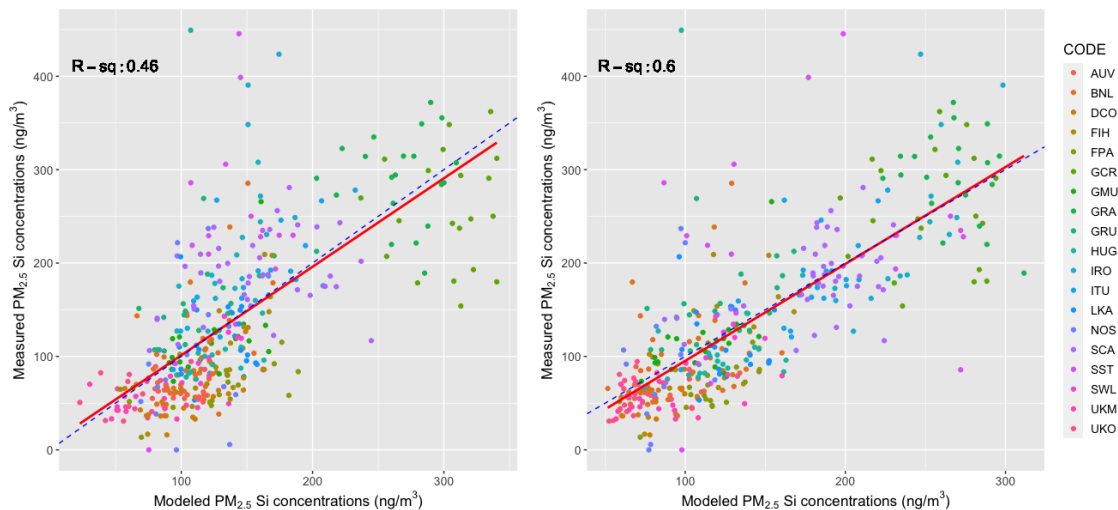

(7) PM<sub>2.5</sub> V (Left two-step SLR step2, Right two-step RF step 1)

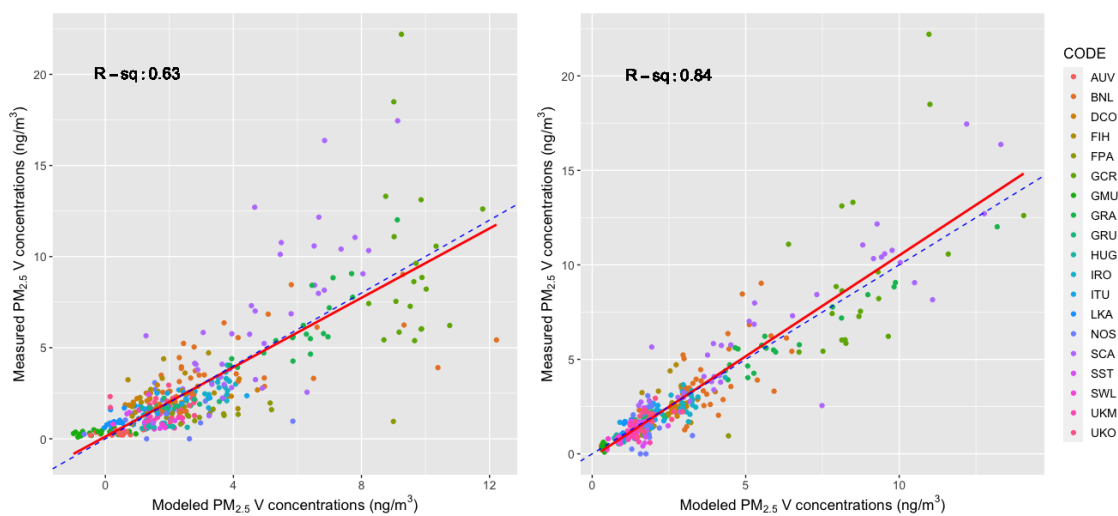

(8) PM<sub>2.5</sub> Zn (Left two-step SLR step2, Right two-step RF step 1)

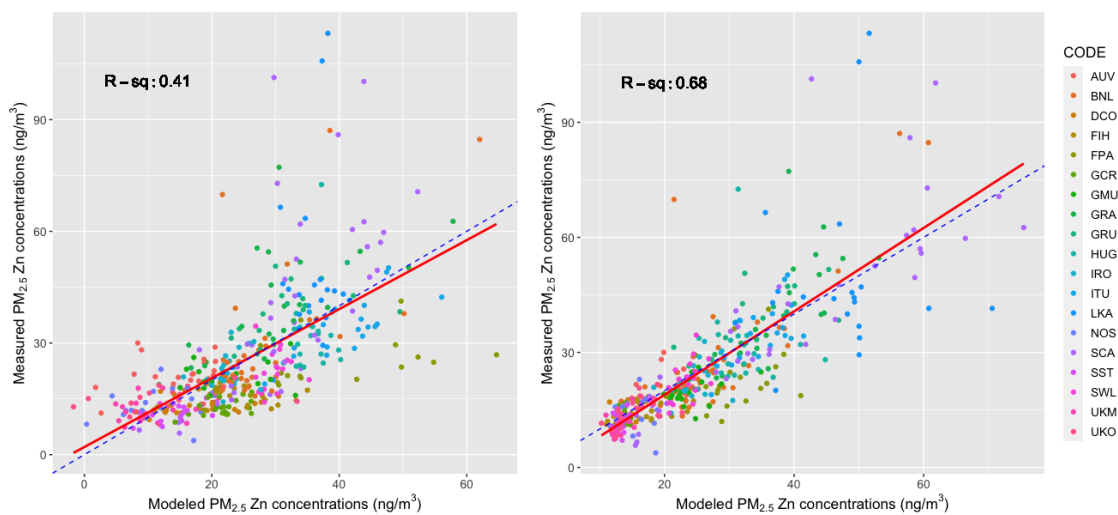

Figure S4. Within-area  $r^2$ s (bars and scale on left) and Root-Mean-Square Errors (RMSEs) (plus signs and scale on right) of PM<sub>2.5</sub> composition models evaluated by five-fold hold-out-validation

(a) **One-step Supervised Linear Regression**

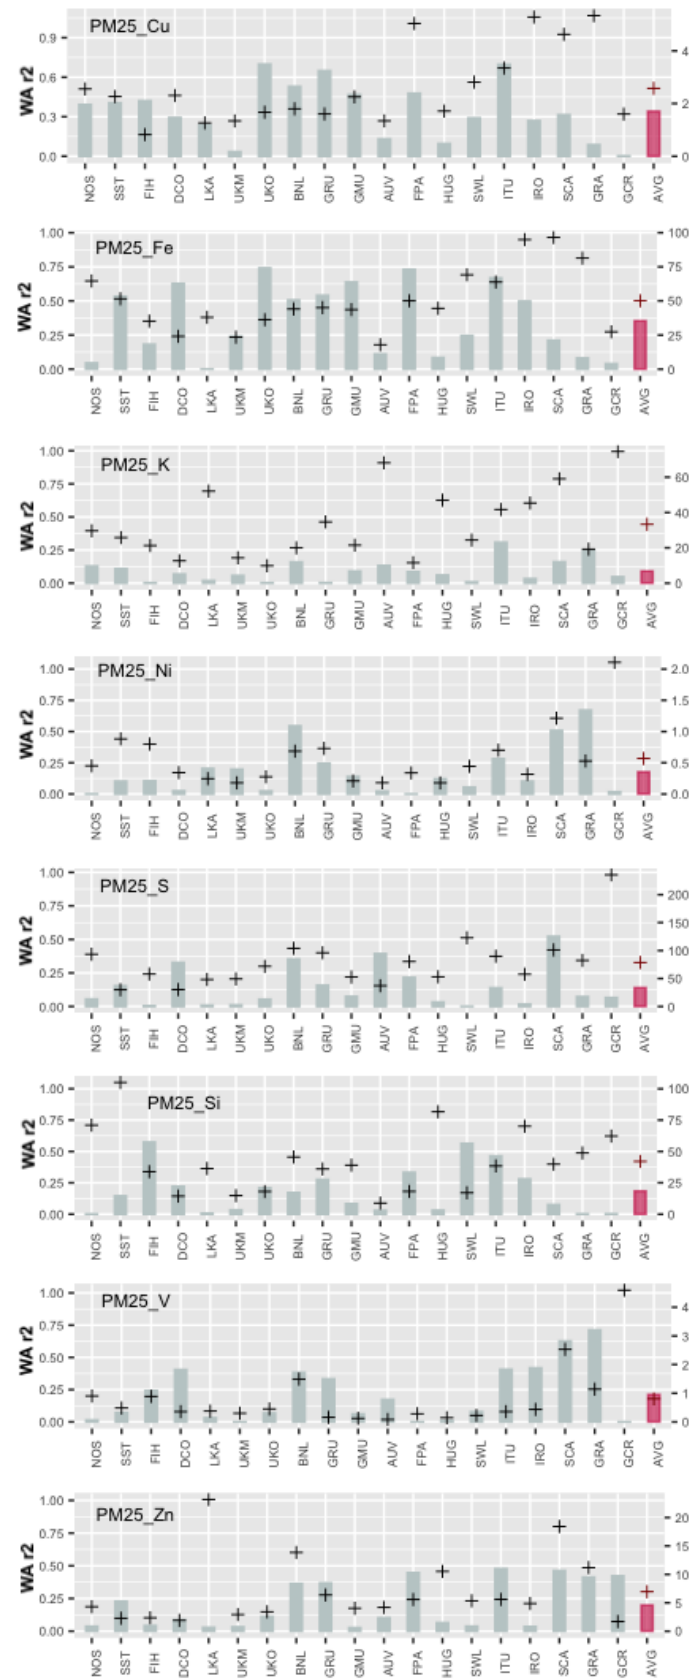

**One-step Random Forest**

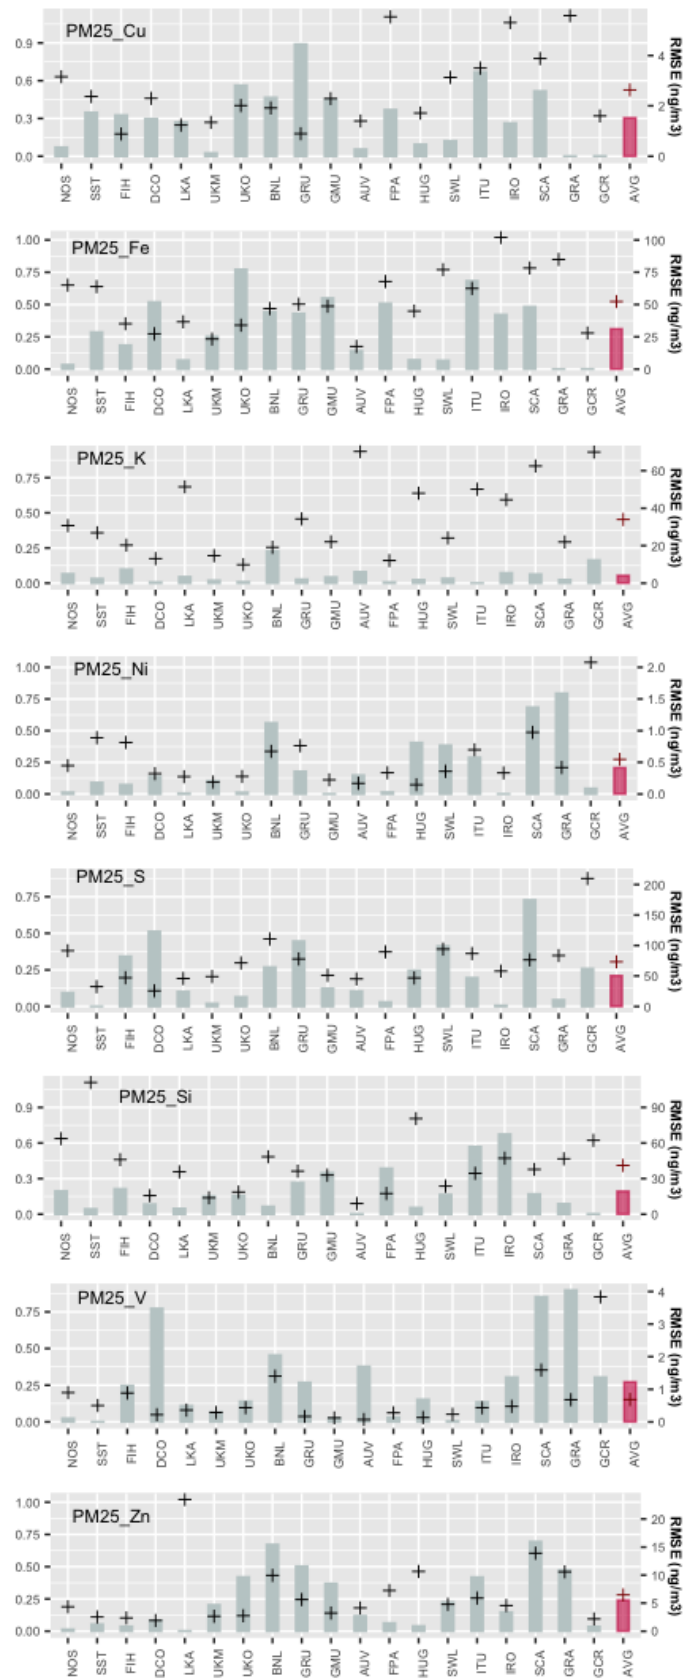

(b) Two-step Supervised Linear Regression, step1

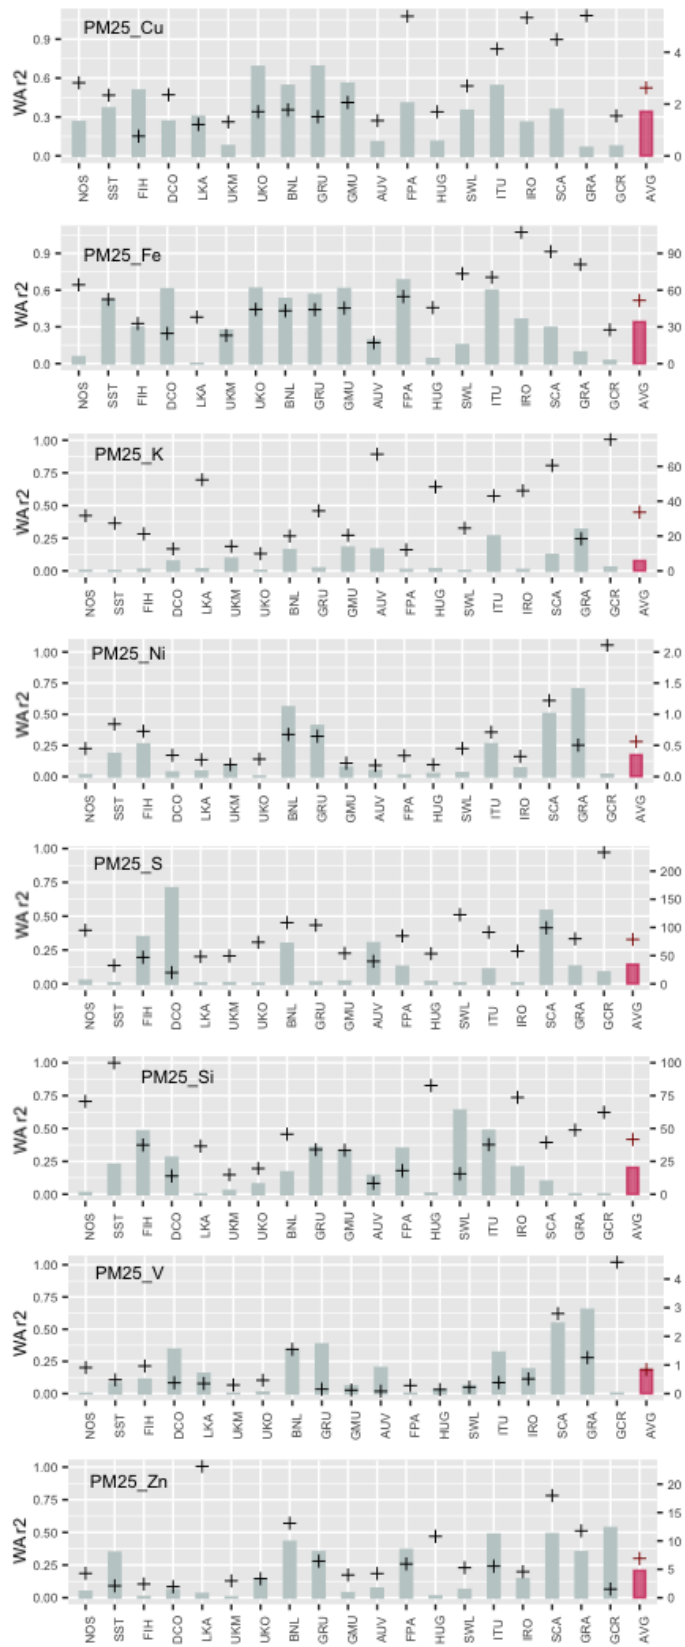

Two-step Random Forest, step1

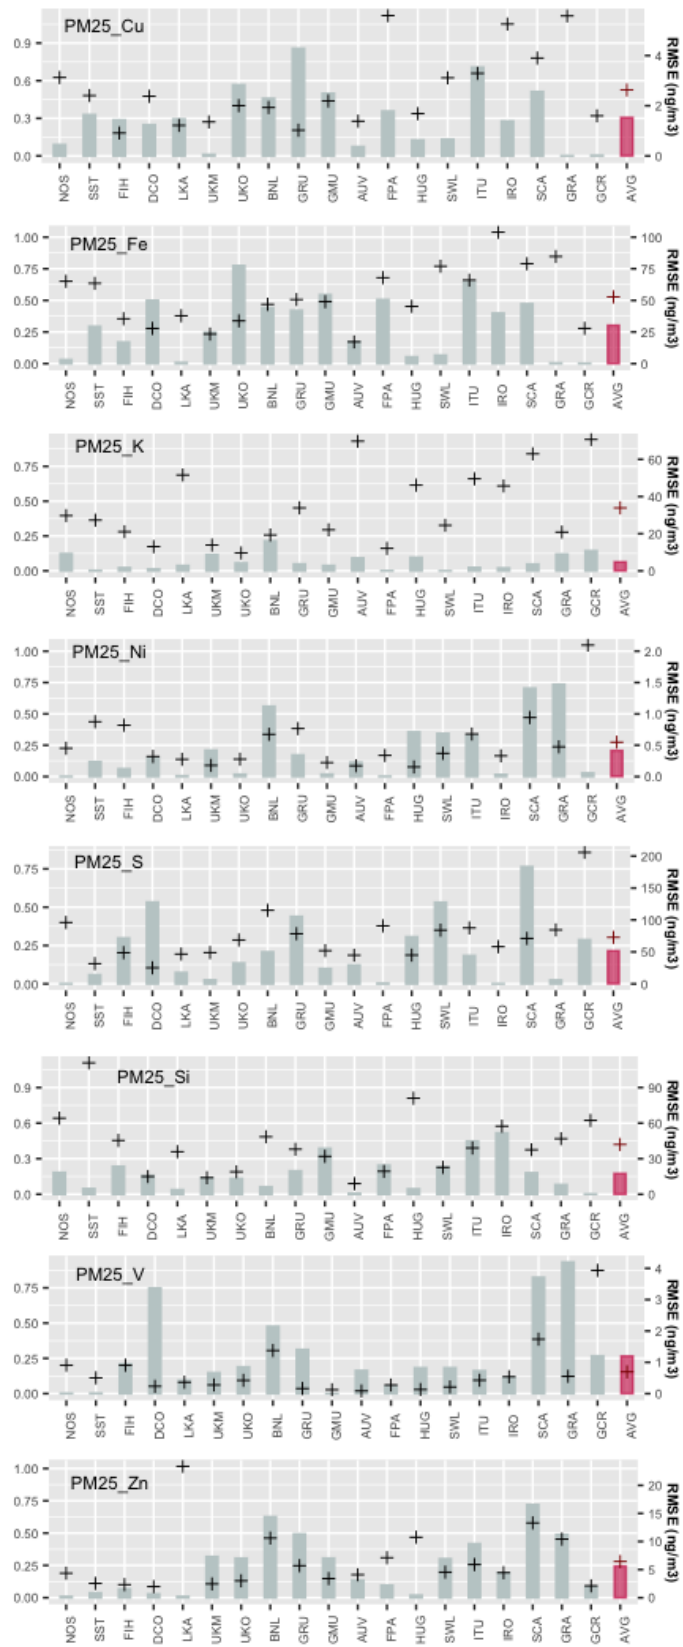

(c) Two-step Supervised Linear Regression, step2

Two-step Random Forest, step2

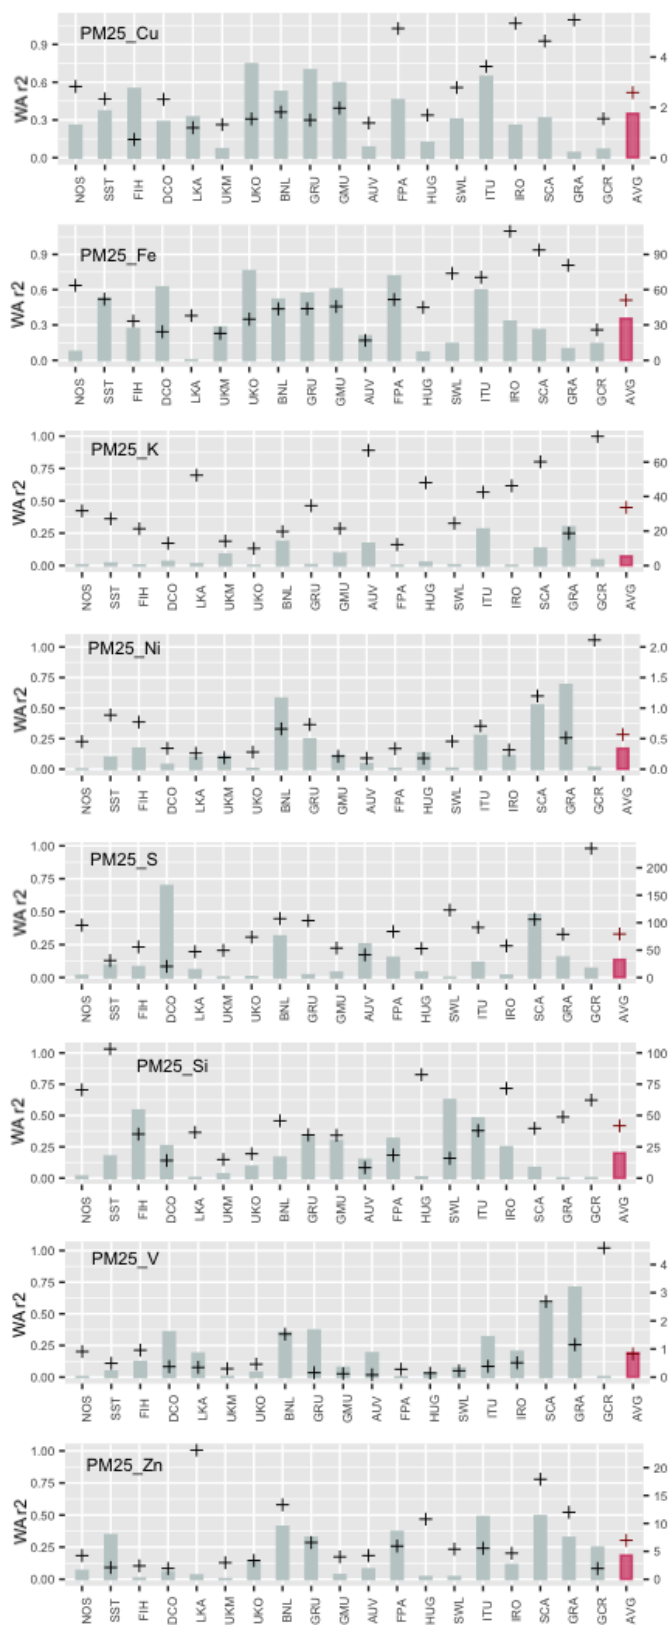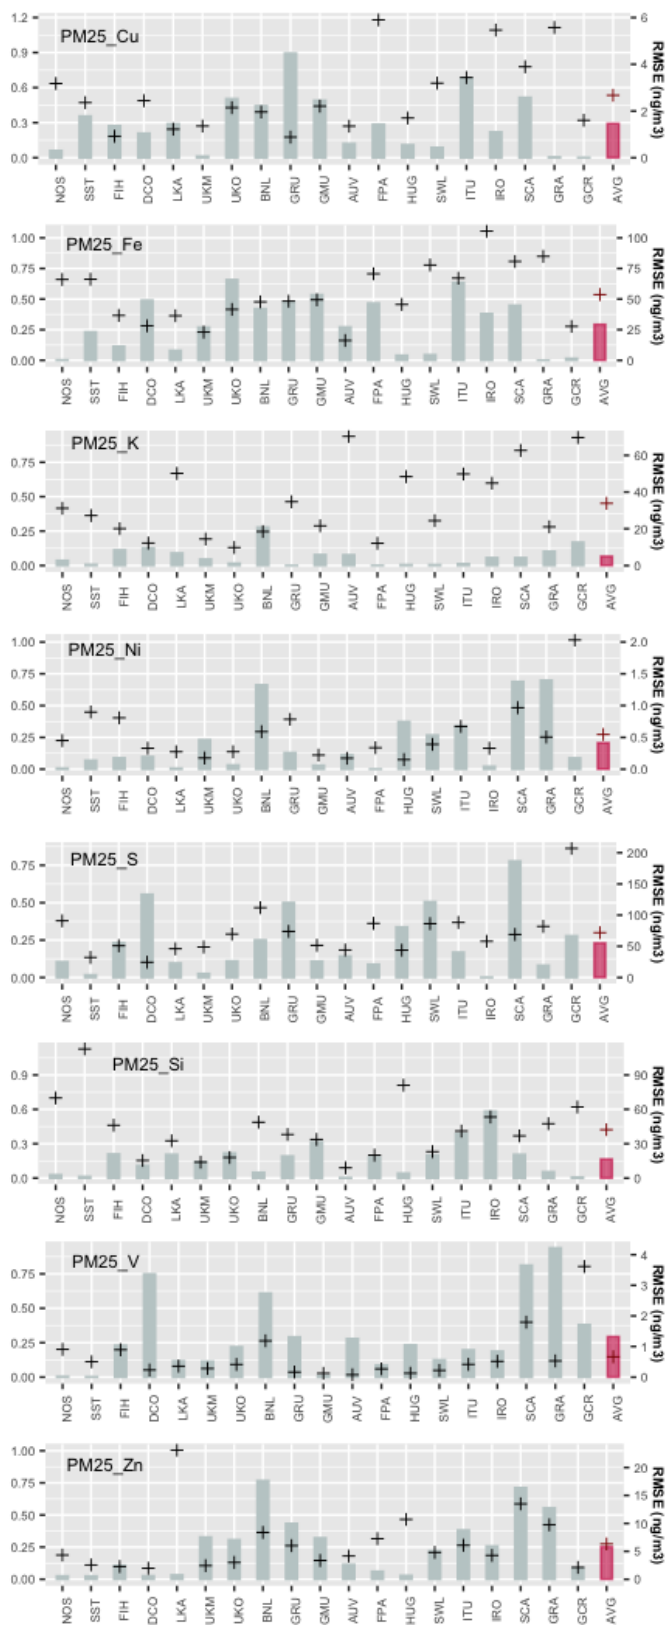

Study areas are shown from north to south. NOS: Oslo (Norway); SST: Stockholm County (Sweden); FIH: Helsinki/Turku (Finland); DCO: Copenhagen (Denmark); LKA: Kaunas (Lithuania); UKM: Manchester (United Kingdom); UKO: London/Oxford (United Kingdom); BNL: Netherlands/Belgium; GRU: Ruhr Area (Germany); GMU: Munich/Augsburg (Germany); AUV: Vorarlberg (Austria); FPA: Paris (France); HUG: Gyor (Hungary); SWL: Lugano (Switzerland); ITU: Turin (Italy); IRO: Rome (Italy); SCA: Catalunya (Spain); GRA: Athens (Greece); GCR: Heraklion (Greece); AVG = average.

Figure S5. Maps of PM<sub>2.5</sub> components

(a) Supervised Linear Regression models

(1) PM<sub>2.5</sub> Cu

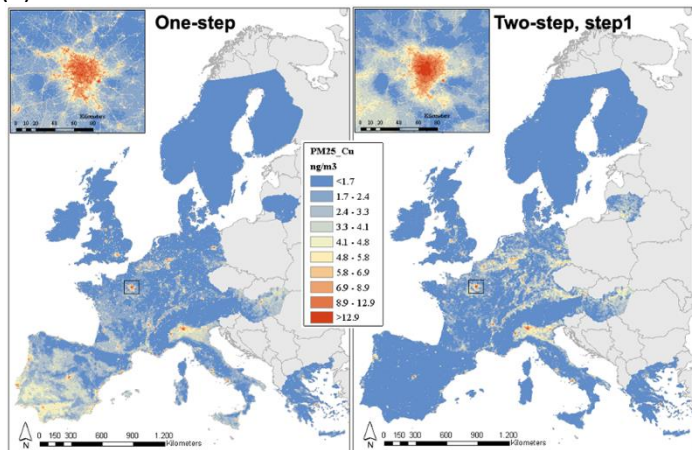

(2) PM<sub>2.5</sub> Fe

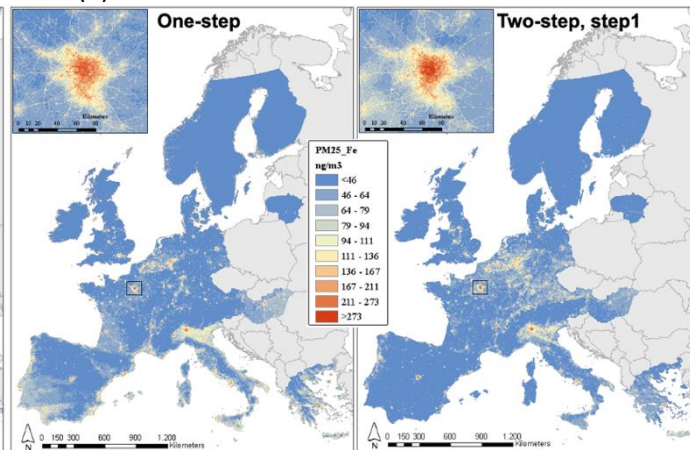

(3) PM<sub>2.5</sub> K

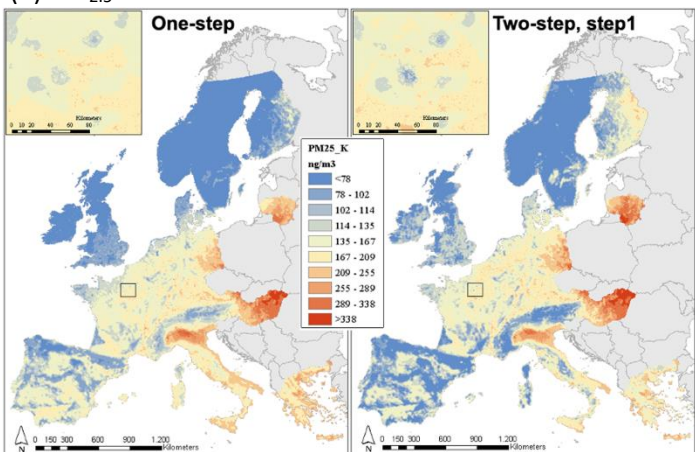

(4) PM<sub>2.5</sub> Ni

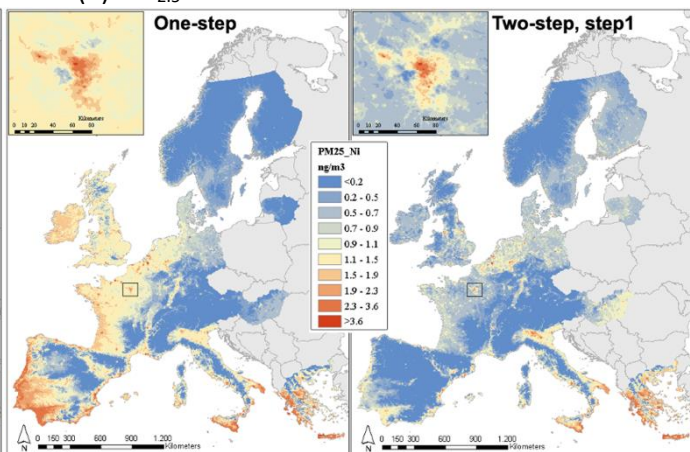

(5) PM<sub>2.5</sub> S

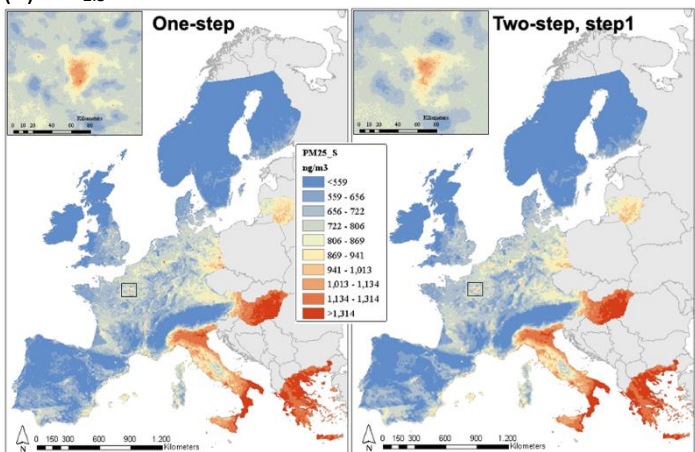

(6) PM<sub>2.5</sub> Si

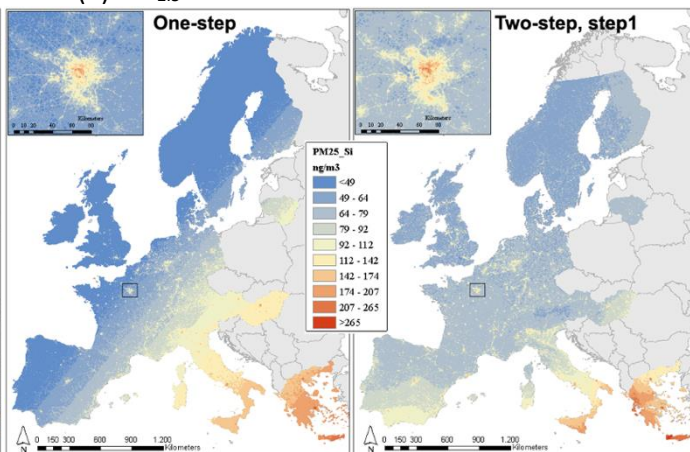

(7) PM<sub>2.5</sub> V

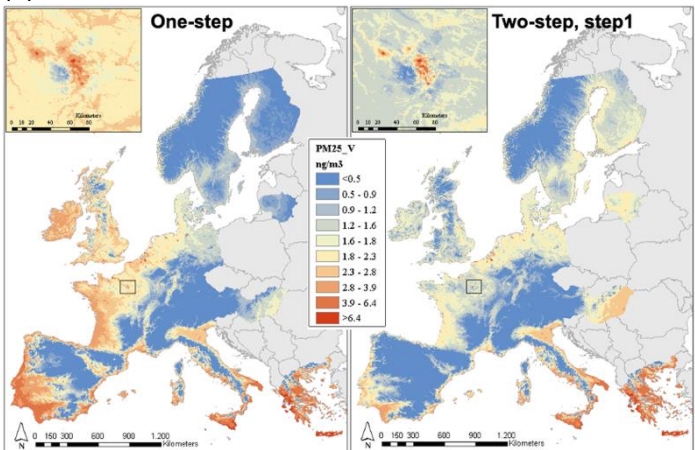

(8) PM<sub>2.5</sub> Zn

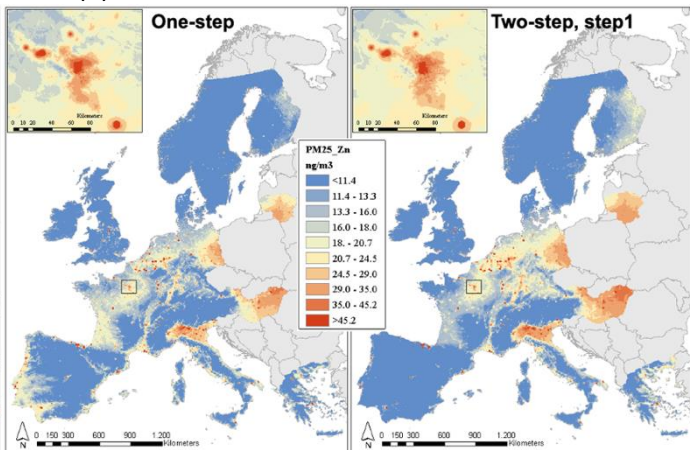

(b) Random Forest models

(1) PM<sub>2.5</sub> Cu

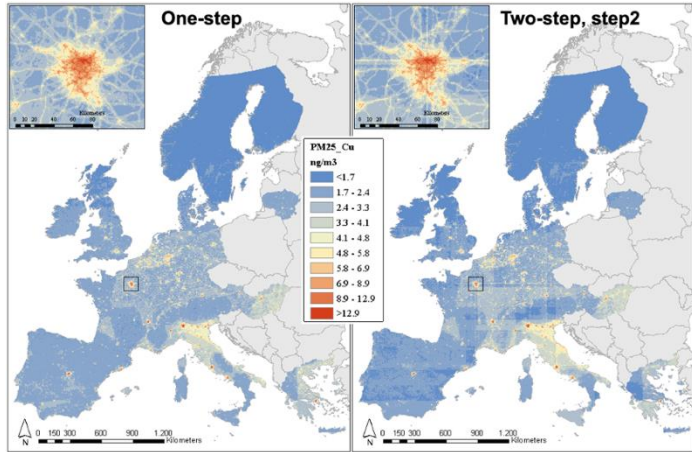

(2) PM<sub>2.5</sub> Fe

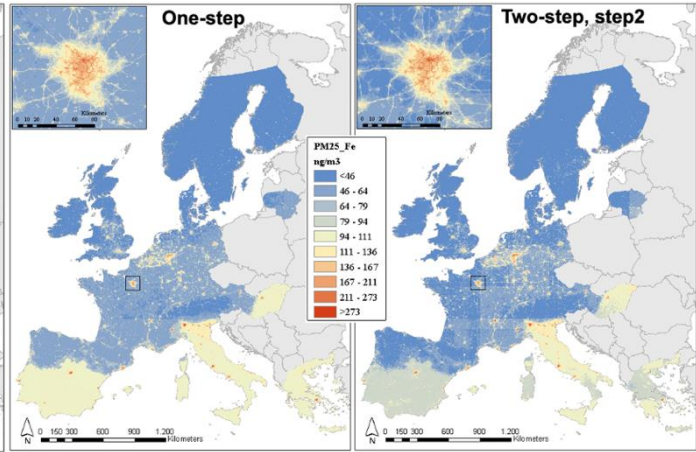

(3) PM<sub>2.5</sub> K

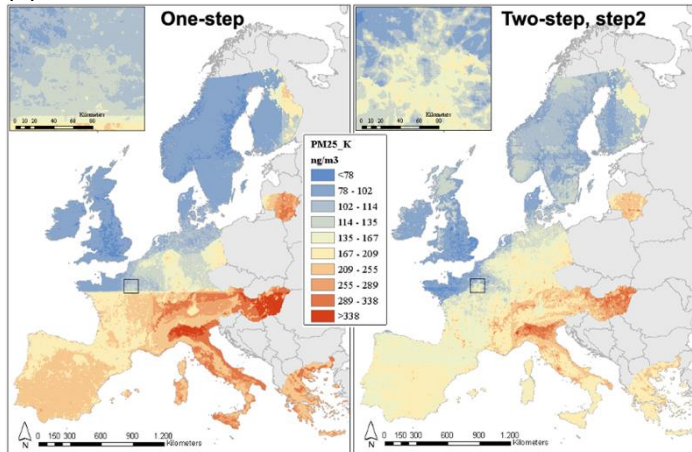

(4) PM<sub>2.5</sub> Ni

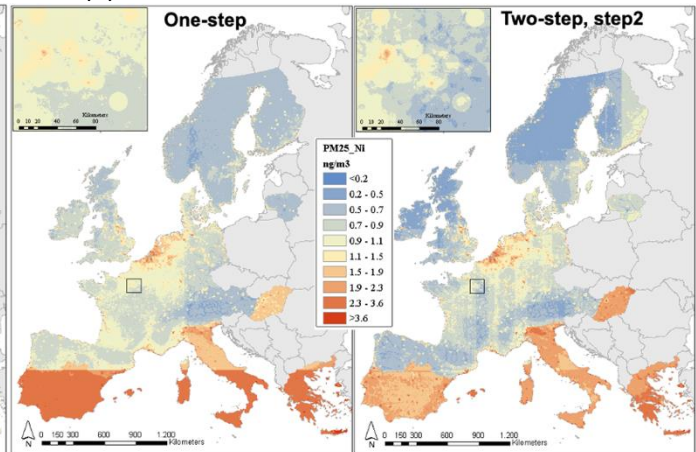

(5) PM<sub>2.5</sub> S

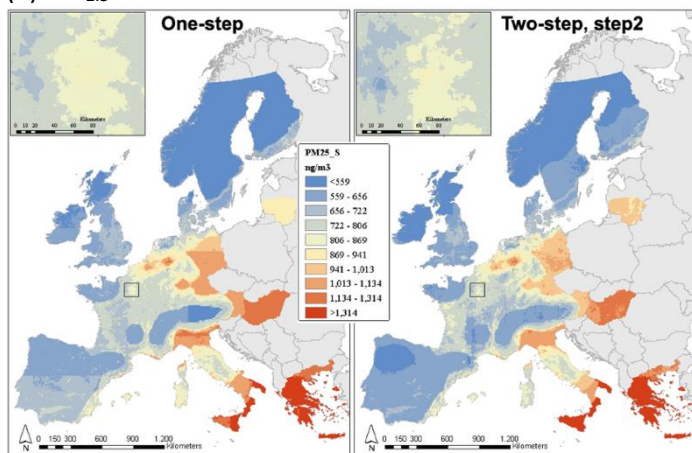

(6) PM<sub>2.5</sub> Si

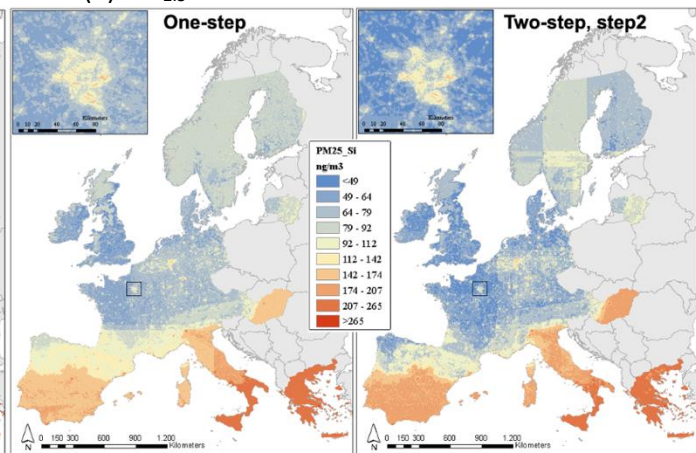

(7) PM<sub>2.5</sub> V

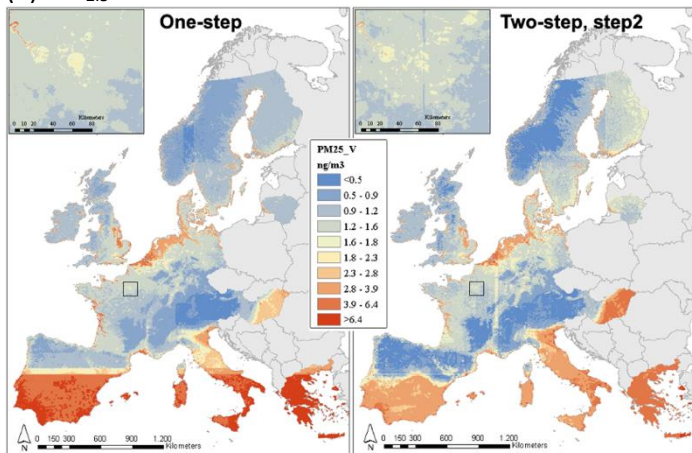

(8) PM<sub>2.5</sub> Zn

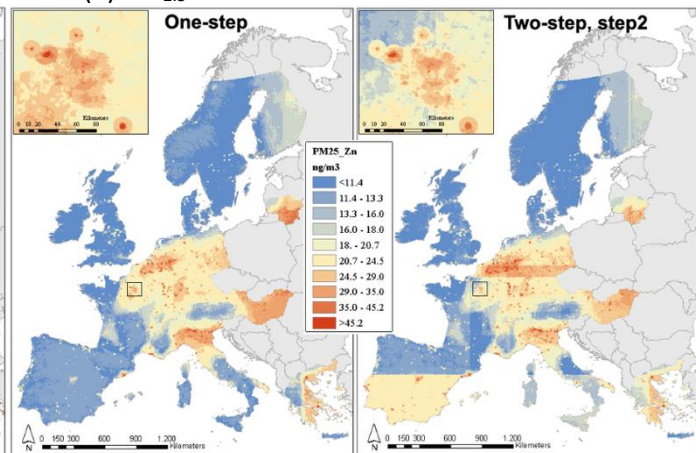

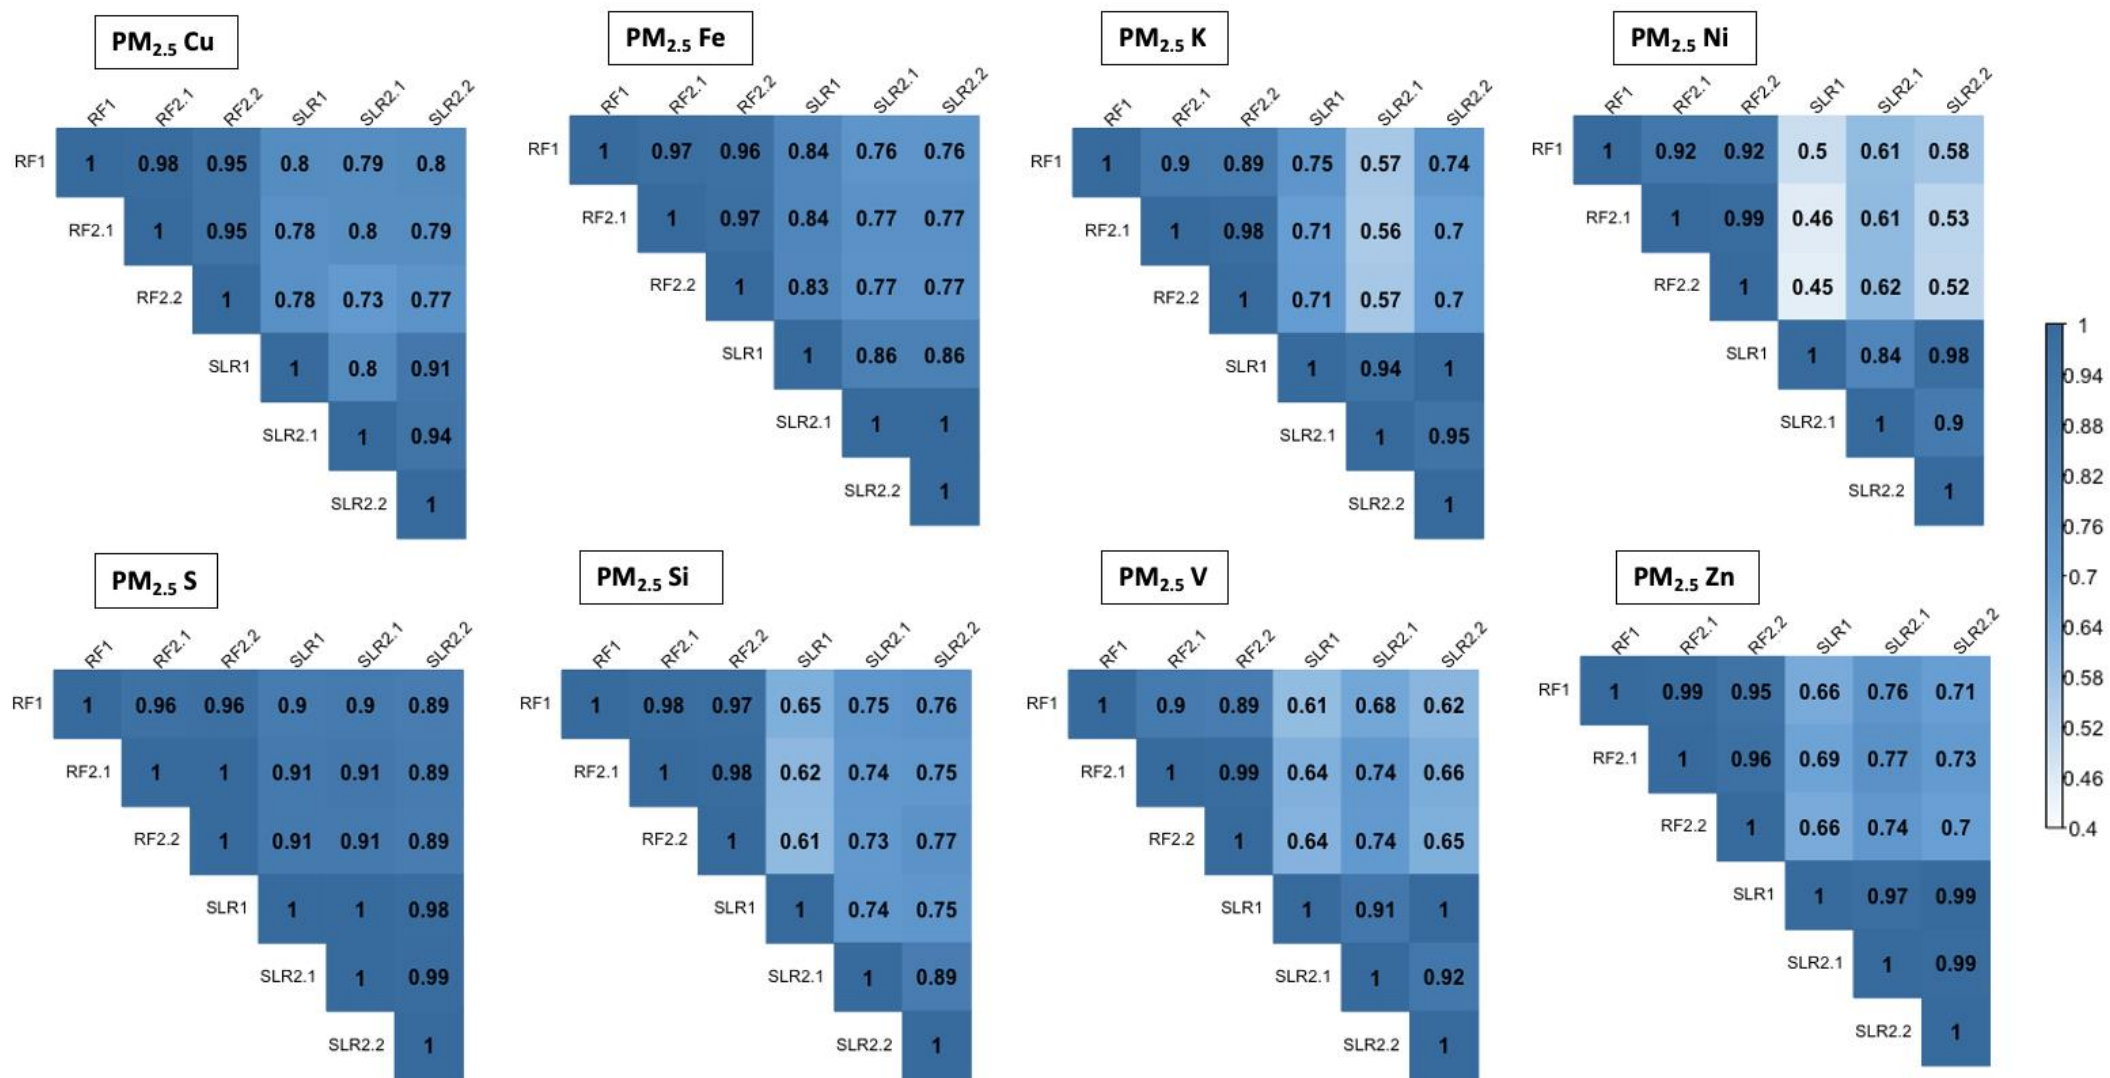

Figure S6. Pearson correlation between model predictions at random locations across ELAPSE countries (N=27,411)

SLR1 = One-step Supervised Linear Regression; SLR2.1 = Two-step Supervised Linear Regression, step1; SLR2.2 = Two-step Supervised Linear Regression, step2; RF1 = One-step Random Forest; RF2.1 = Two-step Random Forest, step1; RF2.2 = Two-step Random Forest, step2.
